# Supplementary material for: No Genetic Causal Association between Periodontitis and Autoimmune Thyroiditis: A Bidirectional Two-Sample Mendelian Randomization Analysis
Source: Research Square preprint supplement (doi:10.21203/rs.3.rs-4247360/v1), 2024-04-22
Supplement: Supplementary file 1 [file 99286757fe7e97320d801edb.docx]

**Supplementary Table 2** Eight independent SNPs related to periodontitis

| **NO** | **SNP** | **EA** | **OA** | **EAF** | **Exposure:** **periodontitis** | | | **Outcome: AIT** | | |
| --- | --- | --- | --- | --- | --- | --- | --- | --- | --- | --- |
| **Beta** | **SE** | ***P*** | **Beta** | **SE** | ***P*** |
| 1 | rs10143801 | G | A | 0.3258 | 0.084 | 0.0171 | 8.66E-07 | -0.0404109 | 0.0678554 | 0.55148 |
| 2 | rs138868497 | C | T | 0.0103 | -1.6387 | 0.3324 | 8.20E-07 | -0.0586687 | 0.28027 | 0.834191 |
| 3 | rs151226594 | G | T | 0.0184 | 0.3671 | 0.0768 | 1.75E-06 | 0.154012 | 0.219431 | 0.48276 |
| 4 | rs2921075 | C | G | 0.6927 | 0.0916 | 0.0183 | 5.44E-07 | -0.0146413 | 0.0713352 | 0.83738 |
| 5 | rs4811024 | G | C | 0.8945 | 0.1337 | 0.0292 | 4.62E-06 | -0.00839516 | 0.126824 | 0.947222 |
| 6 | rs73155039 | G | A | 0.0106 | -0.8316 | 0.1757 | 2.22E-06 | 0.0431166 | 0.411645 | 0.91658 |
| 7 | rs76734229 | A | G | 0.0737 | -0.1761 | 0.037 | 1.94E-06 | -0.0925787 | 0.112636 | 0.411119 |
| 8 | rs9954920 | T | C | 0.3572 | 0.0769 | 0.0163 | 2.37E-06 | -0.0155682 | 0.0684579 | 0.820102 |

Note: SNP: single nucleotide polymorphism; AIT: Autoimmune thyroiditis; EA: effect allele; OA: other allele.
