# Supplementary material for: No Genetic Causal Association between Periodontitis and Autoimmune Thyroiditis: A Bidirectional Two-Sample Mendelian Randomization Analysis
Source: Research Square preprint supplement (doi:10.21203/rs.3.rs-4247360/v1), 2024-04-22
Supplement: Supplementary file 2 [file c23fd08abbe7ecad9f524943.docx]

**Supplementary Table 1** Five independent SNPs related to AIT

| **NO** | **SNP** | **EA** | **OA** | **EAF** | **Exposure:AIT** | | | **Outcome:periodontits** | | |
| --- | --- | --- | --- | --- | --- | --- | --- | --- | --- | --- |
| **Beta** | **SE** | ***P*** | **Beta** | **SE** | ***P*** |
| 1 | rs1025256 | G | A | 0.308637 | 0.314269 | 0.065123 | 1.39E-06 | -0.0067 | 0.0169 | 0.6902 |
| 2 | rs1604966 | C | G | 0.274548 | 0.342512 | 0.066388 | 2.48E-07 | -0.009 | 0.0178 | 0.6107 |
| 3 | rs55906846 | G | C | 0.070468 | 0.509594 | 0.105867 | 1.48E-06 | 0.0261 | 0.0366 | 0.4760 |
| 4 | rs6679677 | A | C | 0.1423 | 0.561915 | 0.077893 | 5.44E-13 | 0.012 | 0.0280 | 0.6695 |
| 5 | rs8088539 | A | G | 0.869113 | -0.39191 | 0.084682 | 3.69E-06 | 0.0116 | 0.0352 | 0.7419 |

Note: SNP: single nucleotide polymorphism; AIT: Autoimmune thyroiditis; EA: effect allele; OA:other allele.
